# Supplementary material for: Diversity-triggered deterministic bacterial assembly constrains community functions
Source: PubMed Central journal article supplement (PMC6707308; doi:10.1038/s41467-019-11787-5), 2019-08-23
Supplement: 41467_2019_11787_MOESM1_ESM.pdf [file 41467_2019_11787_MOESM1_ESM.pdf]

## Supplementary Information

Diversity-triggered deterministic bacterial assembly constrains community functions

**Authors:** Weibing Xun<sup>1,2</sup>, Wei Li<sup>1</sup>, Wu Xiong<sup>1</sup>, Yi Ren<sup>1</sup>, Yunpeng Liu<sup>2</sup>, Youzhi Miao<sup>1</sup>, Zihui Xu<sup>1</sup>,  
Nan Zhang<sup>1</sup>, Qirong Shen<sup>1\*</sup>, Ruifu Zhang<sup>1,2\*</sup>

### **Affiliations:**

<sup>1</sup>Jiangsu Provincial Key Lab of Solid Organic Waste Utilization, Jiangsu Collaborative Innovation Center of Solid Organic Wastes, Educational Ministry Engineering Center of Resource-saving fertilizers, Nanjing Agricultural University, Nanjing, 210095, China

<sup>2</sup>Key Laboratory of Microbial Resources Collection and Preservation, Ministry of Agriculture, Institute of Agricultural Resources and Regional Planning, Chinese Academy of Agricultural Sciences, Beijing 100081, P.R. China

### **\*Corresponding authors:**

**Ruifu Zhang & Qirong Shen**, College of Resources & Environmental Sciences, Nanjing Agricultural University, 210095, Nanjing, China; Correspondence should be addressed to R.Z (email: [rfzhang@njau.edu.cn](mailto:rfzhang@njau.edu.cn)) and Q.S (email: [shenqirong@njau.edu.cn](mailto:shenqirong@njau.edu.cn)).

### **List of content:**

Supplementary Figures: 2

Supplementary Tables: 5

Supplementary Note (R codes): 1

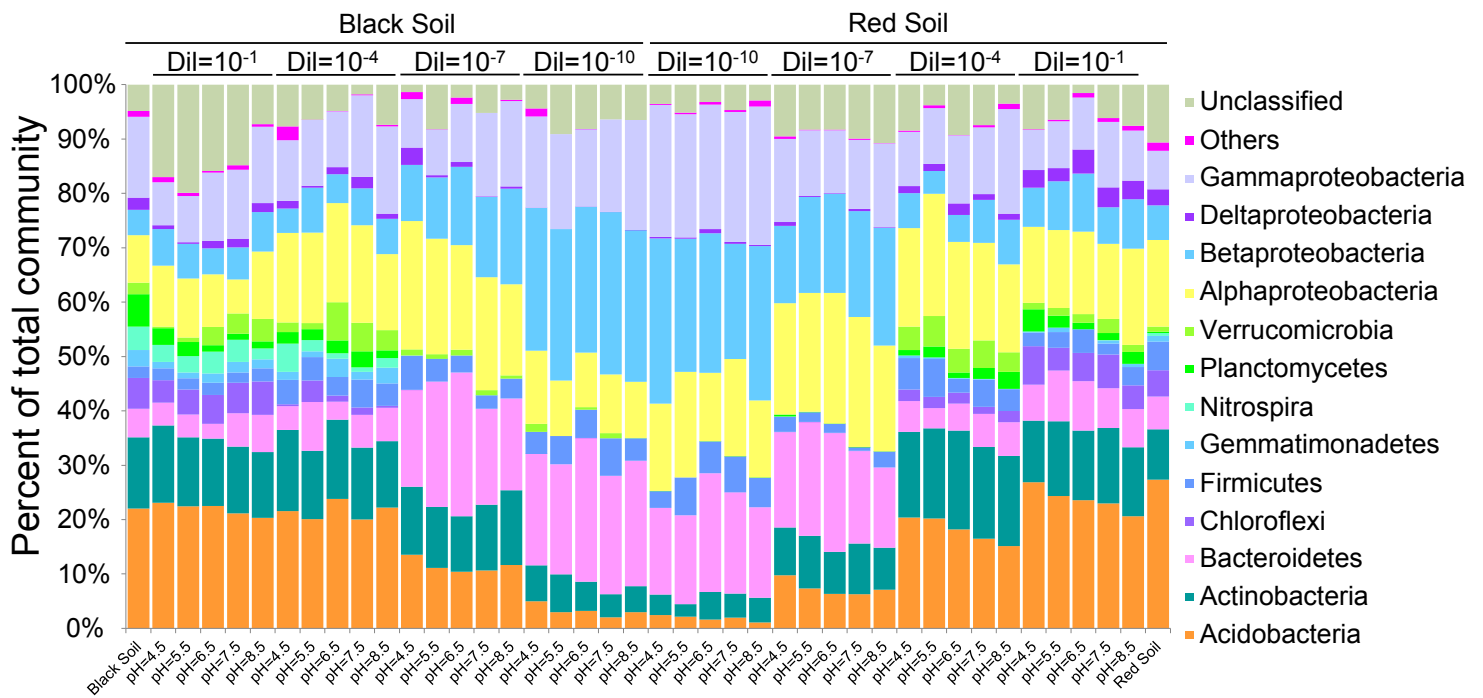

Supplementary Figure 1. Taxonomic distributions of re-assembled bacterial community at phylum level (class level for Proteobacteria) based on amplicon sequencing data. Dil indicates the dilution level.

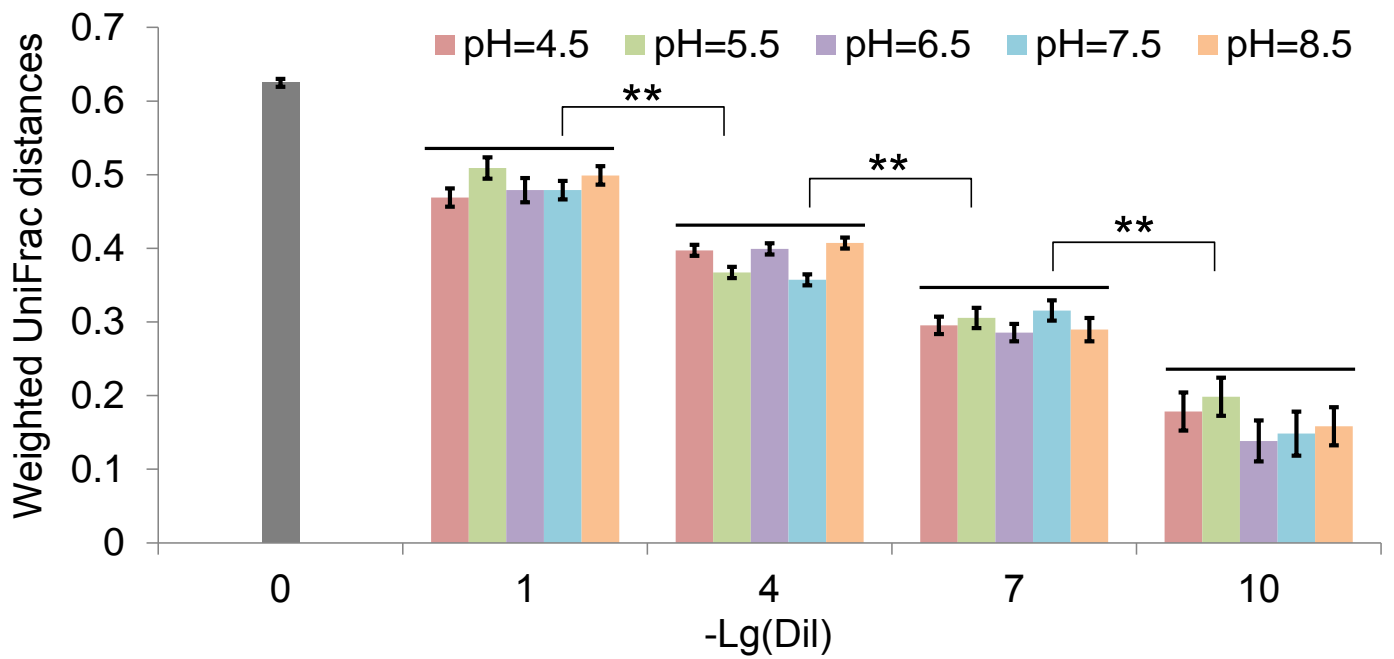

Supplementary Figure 2. Weighted UniFrac distances of pairwise bacterial communities between black soil and red soil at the same pH and dilution level. Dil indicates the dilution level. -Lg(Dil): Lg transformed dilution level. -Lg(Dil) = 0 represents the untreated soil. \*\*,  $P$ -value < 0.001 based on t-tests. Error bars represent standard deviations ( $n = 144$ ).

Supplementary Table 1. The number of unique genes and the increased and decreased genes which are significantly associated with dilution for each functional category.

| Functional category                   | No. Unique Gene | Sig. Decreased | Sig. Increased |
|---------------------------------------|-----------------|----------------|----------------|
| Glycolysis/Gluconeogenesis            | 151949          | 4326(2.85%)    | 66158(43.54%)  |
| TCA cycle                             | 75595           | 1495(1.98%)    | 31542(41.72%)  |
| Pentose phosphate pathway             | 68622           | 3614(5.27%)    | 35498(51.73%)  |
| Fructose & Mannose metabolism         | 79299           | 2841(3.58%)    | 40580(51.17%)  |
| Galactose metabolism                  | 42364           | 955(2.25%)     | 25481(60.15%)  |
| Starch & Sucrose metabolism           | 72156           | 5857(8.12%)    | 38475(53.32%)  |
| Pyruvate metabolism                   | 101546          | 3029(2.98%)    | 51439(50.66%)  |
| Butanoate metabolism                  | 66624           | 1413(2.12%)    | 41273(61.95%)  |
| Glyoxylate & Dicarboxylate metabolism | 99822           | 2747(2.75%)    | 47616(47.70%)  |
| Propanoate metabolism                 | 61750           | 4682(7.58%)    | 21542(34.89%)  |
| Amino acid metabolism                 | 765657          | 281462(36.76%) | 94560(12.35%)  |
| Lipid metabolism                      | 233079          | 70134(30.09%)  | 22453(9.63%)   |
| Xenobiotics biodegradation/metabolism | 98384           | 30943(31.45%)  | 1774(1.80%)    |
| Terpenoids & Polyketides metabolism   | 120489          | 75468(62.63%)  | 2016(1.67%)    |
| Methane metabolism                    | 53827           | 34915(64.87%)  | 3240(6.02%)    |
| Nitrogen metabolism                   | 85115           | 39470(46.37%)  | 7844(9.22%)    |
| Sulfur metabolism                     | 38915           | 21308(54.76%)  | 1856(4.77%)    |

Percentages in brackets are the proportions of the increased or decreased genes to the number of unique genes for each functional category. The correlations were calculated using Spearman correlations. The significant associated genes were counted with the statistical  $r$ -value  $> 0.60$  and  $P$ -value  $< 0.05$ , two-sided tests.

Supplementary Table 2. Indicator values obtained by indicator species analysis for functional genes which are strongly associated with dilution

| KEGG_gene ID     | KO_ID  | KO_name          | KO_definition                                       | KO_EC     | KO_class_1                                | KO_class_2                                          | Enriched/Depleted | IndVal | p     |
|------------------|--------|------------------|-----------------------------------------------------|-----------|-------------------------------------------|-----------------------------------------------------|-------------------|--------|-------|
| msp:Mspyr1_23710 | K01523 | hisE             | phosphoribosyl-ATP pyrophosphohydrolase             | 3.6.1.31  | Amino Acid Metabolism                     | Histidine metabolism                                | Enriched          | 0.803  | 0.001 |
| rpb:RPB_3640     | K02610 | paaB             | ring-1,2-phenylacetyl-CoA epoxidase subunit PaaB    | --        | Amino Acid Metabolism                     | Phenylalanine metabolism                            | Depleted          | 0.653  | 0.002 |
| rha:RHA1_ro01853 | K00014 | aroE             | shikimate dehydrogenase                             | 1.1.1.25  | Amino Acid Metabolism                     | Phenylalanine, tyrosine and tryptophan biosynthesis | Depleted          | 0.539  | 0.001 |
| bam:Bamb_4307    | K03392 | E4.1.1.45, ACMSD | aminocarboxymuconate-semialdehyde decarboxylase     | 4.1.1.45  | Amino Acid Metabolism                     | Tryptophan metabolism                               | Depleted          | 0.697  | 0.002 |
| rpb:RPB_1000     | K00666 | K00666           | fatty-acyl-CoA synthase                             | 6.2.1.-   | Lipid Metabolism                          | Lipid biosynthesis proteins                         | Enriched          | 0.913  | 0.001 |
| bgf:BC1003_0498  | K00252 | GCDH, gcdH       | glutaryl-CoA dehydrogenase                          | 1.3.99.7  | Lipid Metabolism                          | Fatty acid metabolism                               | Enriched          | 0.503  | 0.004 |
| syn:sll1441      | K10257 | FAD8, desB       | omega-3 fatty acid desaturase (delta-15 desaturase) | 1.14.19.- | Lipid Metabolism                          | Biosynthesis of unsaturated fatty acids             | Depleted          | 0.642  | 0.002 |
| aba:Acid345_2787 | K01061 | E3.1.1.45        | carboxymethylenebutenolidase                        | 3.1.1.45  | Xenobiotics Biodegradation and Metabolism | Fluorobenzoate degradation                          | Depleted          | 0.644  | 0.002 |

Continued table

|                         |        |                 |                                                                   |            |                                                 |                         |          |       |       |
|-------------------------|--------|-----------------|-------------------------------------------------------------------|------------|-------------------------------------------------|-------------------------|----------|-------|-------|
| bur:Bcep181<br>94_C7122 | K03379 | E1.14.13.<br>22 | cyclohexanone<br>monooxygenase                                    | 1.14.13.22 | Xenobiotics<br>Biodegradation and<br>Metabolism | Caprolactam degradation | Depleted | 0.757 | 0.001 |
| bcj:BCAL20<br>29        | K03382 | atzB            | hydroxyatrazine<br>ethylaminohydrolase                            | 3.5.99.3   | Xenobiotics<br>Biodegradation and<br>Metabolism | Atrazine degradation    | Depleted | 0.653 | 0.003 |
| bra:BRADO<br>4348       | K08684 | E1.14.13.<br>25 | methane monooxygenase                                             | 1.14.13.25 | Methane<br>metabolism                           | Methane metabolism      | Depleted | 0.665 | 0.003 |
| rpc:RPC_09<br>52        | K02567 | napA            | periplasmic nitrate<br>reductase NapA                             | 1.7.99.4   | Nitrogen<br>metabolism                          | Nitrogen metabolism     | Enriched | 0.938 | 0.001 |
| acm:Acix9_<br>0125      | K00372 | E1.7.99.4<br>C  | nitrate reductase catalytic<br>subunit<br>nitrogenase             | 1.7.99.4   | Nitrogen<br>metabolism                          | Nitrogen metabolism     | Depleted | 0.698 | 0.001 |
| azc:AZC_10<br>39        | K02591 | nifK            | molybdenum-iron protein<br>beta chain                             | 1.18.6.1   | Nitrogen<br>metabolism                          | Nitrogen metabolism     | Depleted | 0.771 | 0.001 |
| bps:BPSS12<br>43        | K00362 | nirB            | nitrite reductase<br>(NAD(P)H) large subunit                      | 1.7.1.4    | Nitrogen<br>metabolism                          | Nitrogen metabolism     | Depleted | 0.812 | 0.001 |
| ach:Achl_28<br>19       | K00390 | cysH            | phosphoadenosine<br>phosphosulfate reductase<br>sulfite reductase | 1.8.4.8    | Sulfur metabolism                               | Sulfur metabolism       | Depleted | 0.946 | 0.002 |
| pfv:Psefu_2<br>275      | K00381 | cysI            | (NADPH) hemoprotein<br>beta-component                             | 1.8.1.2    | Sulfur metabolism                               | Sulfur metabolism       | Depleted | 0.918 | 0.001 |

Enriched: the gene was enriched by dilution; Depleted: the gene was depleted by dilution.

Supplementary Table 3. The added amount of CaO and FeSO<sub>4</sub> to manipulate soil pH.

| Soil pH | Black Soil (pH = 8.0)                          |                                    | Red Soil (pH = 5.3)                            |                                    |
|---------|------------------------------------------------|------------------------------------|------------------------------------------------|------------------------------------|
|         | 1M FeSO <sub>4</sub><br>(ml kg <sup>-1</sup> ) | 0.5M CaO<br>(ml kg <sup>-1</sup> ) | 1M FeSO <sub>4</sub><br>(ml kg <sup>-1</sup> ) | 0.5M CaO<br>(ml kg <sup>-1</sup> ) |
| 4.5     | 98.7                                           | 0                                  | 9.5                                            | 0                                  |
| 5.5     | 26.4                                           | 0                                  | 0                                              | 1.2                                |
| 6.5     | 11.2                                           | 0                                  | 0                                              | 14.7                               |
| 7.5     | 2.5                                            | 0                                  | 0                                              | 38.3                               |
| 8.5     | 0                                              | 1.3                                | 0                                              | 67.5                               |

Supplementary Table 4. The concentrations of Fe, Ca and SO<sub>4</sub><sup>2-</sup> of soil samples after incubation.

| Soil Sample          | Fe (g kg <sup>-1</sup> ) | Ca (g kg <sup>-1</sup> ) | SO <sub>4</sub> <sup>2-</sup> (mmol kg <sup>-1</sup> ) |
|----------------------|--------------------------|--------------------------|--------------------------------------------------------|
| Untreated Black Soil | 16.1 (0.6 <b>d</b> )     | 11.05 (0.7 <b>ab</b> )   | 4.1 (0.06 <b>e</b> )                                   |
| Black Soil (pH=4.5)  | 24.7 (0.7 <b>a</b> )     | 10.25 (0.4 <b>b</b> )    | 21.5 (0.16 <b>a</b> )                                  |
| Black Soil (pH=5.5)  | 19.5 (0.2 <b>b</b> )     | 9.26 (0.6 <b>e</b> )     | 8.6 (0.08 <b>b</b> )                                   |
| Black Soil (pH=6.5)  | 17.6 (0.7 <b>c</b> )     | 12.01 (0.5 <b>a</b> )    | 4.6 (0.07 <b>c</b> )                                   |
| Black Soil (pH=7.5)  | 16.9 (1.0 <b>cd</b> )    | 11.85 (1.2 <b>a</b> )    | 4.4 (0.12 <b>d</b> )                                   |
| Black Soil (pH=8.5)  | 15.5 (0.8 <b>d</b> )     | 12.19 (1.4 <b>a</b> )    | 4.4 (0.19 <b>d</b> )                                   |
| Untreated Red Soil   | 31.2 (1.1 <b>ab</b> )    | 0.09 (0.02 <b>d</b> )    | 15.1 (0.08 <b>e</b> )                                  |
| Red Soil (pH=4.5)    | 30.4 (0.7 <b>b</b> )     | 0.11 (0.06 <b>d</b> )    | 16.2 (0.06 <b>c</b> )                                  |
| Red Soil (pH=5.5)    | 27.8 (0.6 <b>c</b> )     | 0.13 (0.05 <b>d</b> )    | 15.7 (0.14 <b>d</b> )                                  |
| Red Soil (pH=6.5)    | 30.7 (0.4 <b>b</b> )     | 0.25 (0.06 <b>c</b> )    | 16.4 (0.11 <b>b</b> )                                  |
| Red Soil (pH=7.5)    | 29.9 (1.2 <b>b</b> )     | 0.57 (0.07 <b>b</b> )    | 15.2 (0.11 <b>e</b> )                                  |
| Red Soil (pH=8.5)    | 32.6 (0.9 <b>a</b> )     | 0.75 (0.02 <b>a</b> )    | 16.6 (0.13 <b>a</b> )                                  |

Values indicate the mean concentrations of Fe, Ca and SO<sub>4</sub><sup>2-</sup> in soil samples. Values in brackets represent standard deviations (n = 12). Different letters in column (shown in Bold) indicate significant differences (*P*-value < 0.05, Duncan's multiple comparisons test) within the same soil type.



Supplementary Table 5. Summary of the reads of amplicon sequencing data and the assembly results of metagenomic sequencing data.

| Soil pH | Black Soil              |                  | Red Soil                |                  |                        |                   |                 |             |                 |
|---------|-------------------------|------------------|-------------------------|------------------|------------------------|-------------------|-----------------|-------------|-----------------|
|         | Amplicon sequencing     |                  | Amplicon sequencing     |                  | Metagenomic sequencing |                   |                 |             |                 |
|         | Dilution level          | No. of 16S reads | Dilution level          | No. of 16S reads | Assembly rate (%)      | total length (bp) | Average len(bp) | N50 Len(bp) | No. of unigenes |
|         | Untreated Black Soil    | 22697            | Untreated Red Soil      | 23874            | 66.47                  | 1,982,255,184     | 758             | 838         | 38,531,429      |
| 4.5     | Dil = 10 <sup>-1</sup>  | 17855            | Dil = 10 <sup>-1</sup>  | 12331            | 63.04                  | 3,241,428,864     | 710             | 748         | 37,351,896      |
|         | Dil = 10 <sup>-4</sup>  | 21055            | Dil = 10 <sup>-4</sup>  | 11384            | 62.10                  | 3,354,976,701     | 631             | 631         | 11,795,336      |
|         | Dil = 10 <sup>-7</sup>  | 20858            | Dil = 10 <sup>-7</sup>  | 11166            | 64.80                  | 3,227,262,438     | 672             | 671         | 2,359,067       |
|         | Dil = 10 <sup>-10</sup> | 16703            | Dil = 10 <sup>-10</sup> | 13776            | 63.19                  | 3,203,194,074     | 729             | 783         | 629,085         |
| 5.5     | Dil = 10 <sup>-1</sup>  | 19005            | Dil = 10 <sup>-1</sup>  | 12442            | 56.70                  | 3,714,657,996     | 679             | 678         | 37,725,415      |
|         | Dil = 10 <sup>-4</sup>  | 22084            | Dil = 10 <sup>-4</sup>  | 13015            | 56.22                  | 3,727,109,277     | 662             | 645         | 11,913,289      |
|         | Dil = 10 <sup>-7</sup>  | 26696            | Dil = 10 <sup>-7</sup>  | 12588            | 63.06                  | 2,882,336,403     | 695             | 724         | 2,382,658       |
|         | Dil = 10 <sup>-10</sup> | 19762            | Dil = 10 <sup>-10</sup> | 15634            | 57.30                  | 2,737,577,775     | 585             | 554         | 635,375         |
| 6.5     | Dil = 10 <sup>-1</sup>  | 18398            | Dil = 10 <sup>-1</sup>  | 11469            | 58.74                  | 2,898,502,167     | 663             | 646         | 38,102,669      |
|         | Dil = 10 <sup>-4</sup>  | 19209            | Dil = 10 <sup>-4</sup>  | 12101            | 62.10                  | 2,954,053,434     | 688             | 691         | 12,032,422      |
|         | Dil = 10 <sup>-7</sup>  | 28208            | Dil = 10 <sup>-7</sup>  | 11970            | 57.92                  | 3,279,099,201     | 681             | 687         | 2,406,484       |
|         | Dil = 10 <sup>-10</sup> | 30306            | Dil = 10 <sup>-10</sup> | 12129            | 62.77                  | 3,502,986,303     | 681             | 688         | 641,729         |
| 7.5     | Dil = 10 <sup>-1</sup>  | 25539            | Dil = 10 <sup>-1</sup>  | 11636            | 64.12                  | 3,793,939,005     | 677             | 673         | 37,340,615      |
|         | Dil = 10 <sup>-4</sup>  | 25768            | Dil = 10 <sup>-4</sup>  | 12118            | 62.07                  | 3,557,786,829     | 690             | 693         | 11,791,773      |
|         | Dil = 10 <sup>-7</sup>  | 26905            | Dil = 10 <sup>-7</sup>  | 11557            | 66.85                  | 3,835,308,711     | 724             | 771         | 2,358,355       |
|         | Dil = 10 <sup>-10</sup> | 28127            | Dil = 10 <sup>-10</sup> | 11610            | 63.02                  | 3,189,474,909     | 689             | 715         | 628,895         |
| 8.5     | Dil = 10 <sup>-1</sup>  | 23659            | Dil = 10 <sup>-1</sup>  | 11020            | 66.58                  | 3,256,577,337     | 682             | 704         | 36,593,803      |
|         | Dil = 10 <sup>-4</sup>  | 27587            | Dil = 10 <sup>-4</sup>  | 11324            | 56.75                  | 2,874,628,578     | 576             | 550         | 11,555,938      |
|         | Dil = 10 <sup>-7</sup>  | 27177            | Dil = 10 <sup>-7</sup>  | 11759            | 57.30                  | 2,777,649,639     | 588             | 560         | 2,311,188       |
|         | Dil = 10 <sup>-10</sup> | 39488            | Dil = 10 <sup>-10</sup> | 13476            | 66.77                  | 2,313,261,129     | 678             | 675         | 616,317         |

## Supplementary Note 1 (R codes)

```
rm(list=ls())
data.set.name = 'test'
setwd("E:/NTI_files")

library(picante)

# read in a rarefied OTU table with all OTUs have abundance of 1 or greater.
otu =
as.data.frame(read.table(paste(data.set.name, "_rarefied_otu.txt", sep=""), header=T, row.names=1)); # species as rows, samples as columns for otu table

# read in phylo and match
phylowb = read.tree(paste(data.set.name, "_phylo_tree.nwk", sep=""))
phylowb

match.phylowb.otu = match.phylowb.data(phylowb, t(otu))
str(match.phylowb.otu)

write.tree(match.phylowb.otu$phy, paste(data.set.name, "_matched_tree_to_rarified_otu.tre", sep=""))

phylowbMatch =
read.tree(paste(data.set.name, "_tree_matched_to_rarified_otu_table.tre", sep=""))
phyloMatch

match.phylowbMatch.otu = match.phylowbMatch.data(phylowbMatch, t(otu))
str(match.phylowbMatch.otu)

beta.mntd.weighted =
as.matrix(comdistnt(t(match.phylowbMatch.otu$data), cophenetic(match.phylowbMatch.otu$phy), abundance.weighted=T));
dim(beta.mntd.weighted);
beta.mntd.weighted[1:5, 1:5];
write.csv(beta.mntd.weighted, 'betaMNTD_weighted.csv', quote=F);

identical(colnames(match.phylowbMatch.otu$data), colnames(beta.mntd.weighted)); #
Just checking and should be TRUE
identical(colnames(match.phylowbMatch.otu$data), rownames(beta.mntd.weighted));
# Just checking and should be TRUE

# calculate randomized betaMNTD
```

```

beta.reps = 999; # number of randomizations

random.weighted.bMNTD.comp =
array(c(-999),dim=c(ncol(match.phylobMatch.otu$data),ncol(match.phylobMatch.
otu$data),beta.reps));
dim(random.weighted.bMNTD.comp);

for (rep in 1:beta.reps) {

  random.weighted.bMNTD.comp[,rep] =
as.matrix(comdistnt(t(match.phylobMatch.otu$data),taxaShuffle(cophenetic(match.
phylobMatch.otu$phy)),abundance.weighted=T,exclude.conspecifics = F));

  print(c(date(),rep));

}

weighted.bNTI =
matrix(c(NA),nrow=ncol(match.phylobMatch.otu$data),ncol=ncol(match.phylob
Match.otu$data));

dim(weighted.bNTI);

for (columns in 1:(ncol(match.phylobMatch.otu$data)-1)) {
  for (rows in (columns+1):ncol(match.phylobMatch.otu$data)) {

    random.vals = random.weighted.bMNTD.comp[rows,columns,];
    weighted.bNTI[rows,columns] = (beta.mntd.weighted[rows,columns] -
mean(random.vals)) / sd(random.vals);
    rm("random.vals");

  };
};

rownames(weighted.bNTI) = colnames(match.phylobMatch.otu$data);
colnames(weighted.bNTI) = colnames(match.phylobMatch.otu$data);
weighted.bNTI;
write.csv(weighted.bNTI,"weighted_bNTI.csv",quote=F);

```
